# Supplementary material
Source: Research Square preprint supplement (doi:10.21203/rs.3.rs-9413609/v1)

**high****low**

TIMER

*B cell*

CIBERSORT

*B cell plasma**T cell CD8+**T cell follicular helper**Macrophage M0*

CIBERSORT-ABR

*B cell plasma**T cell CD8+**T cell follicular helper*

QUANTISEQ

*B cell**Monocyte**Neutrophil**T cell CD8+*

MCP-COUNTER

*T cell CD8+**cytotoxicity score**B cell**Neutrophil*

XCELL

*B cell**T cell CD8+ central memory**Class-switched memory B cell**B cell memory**Neutrophil**B cell plasma*

EPIC

*B cell***Expression**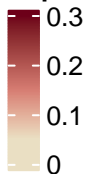

Supplement: Supplementary file 16 [file a2aa1ea6afaa0c51e1bd5a58.pdf]
