# Supplementary material
Source: Research Square preprint supplement (doi:10.21203/rs.3.rs-9413609/v1)

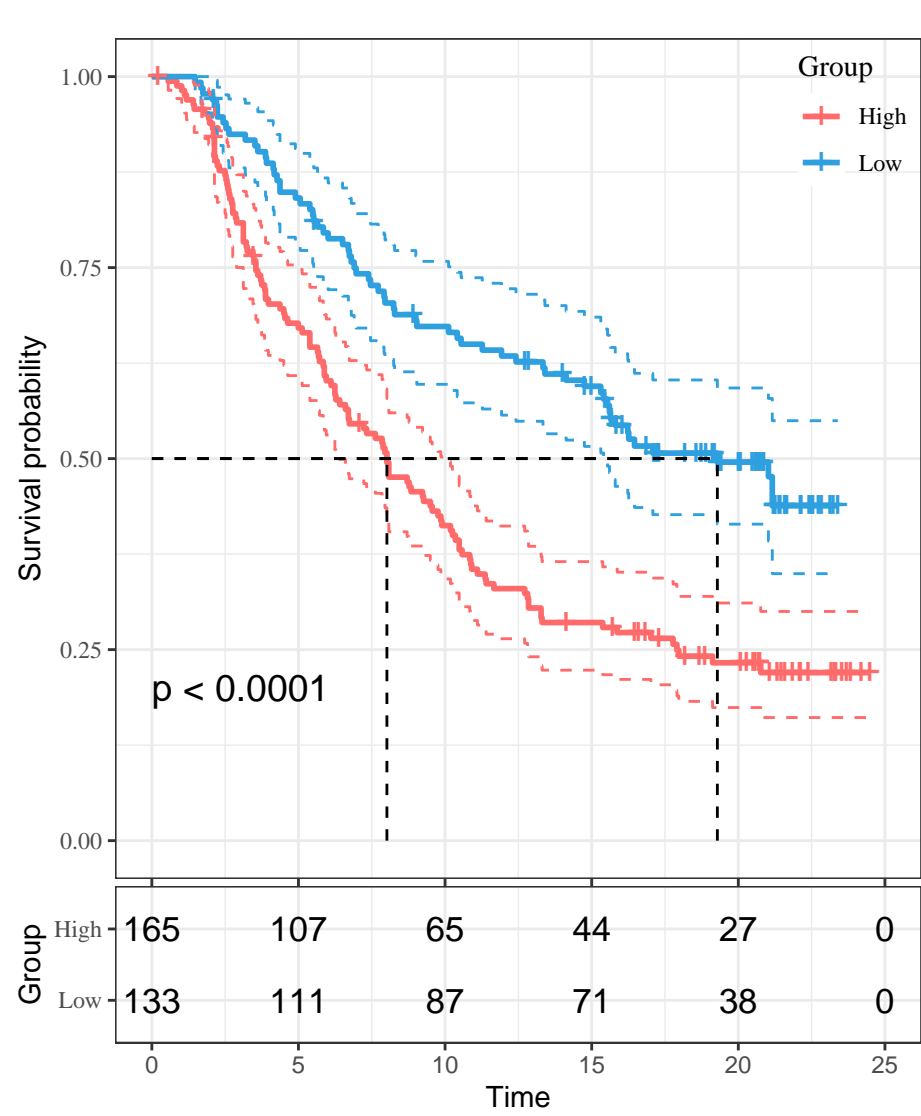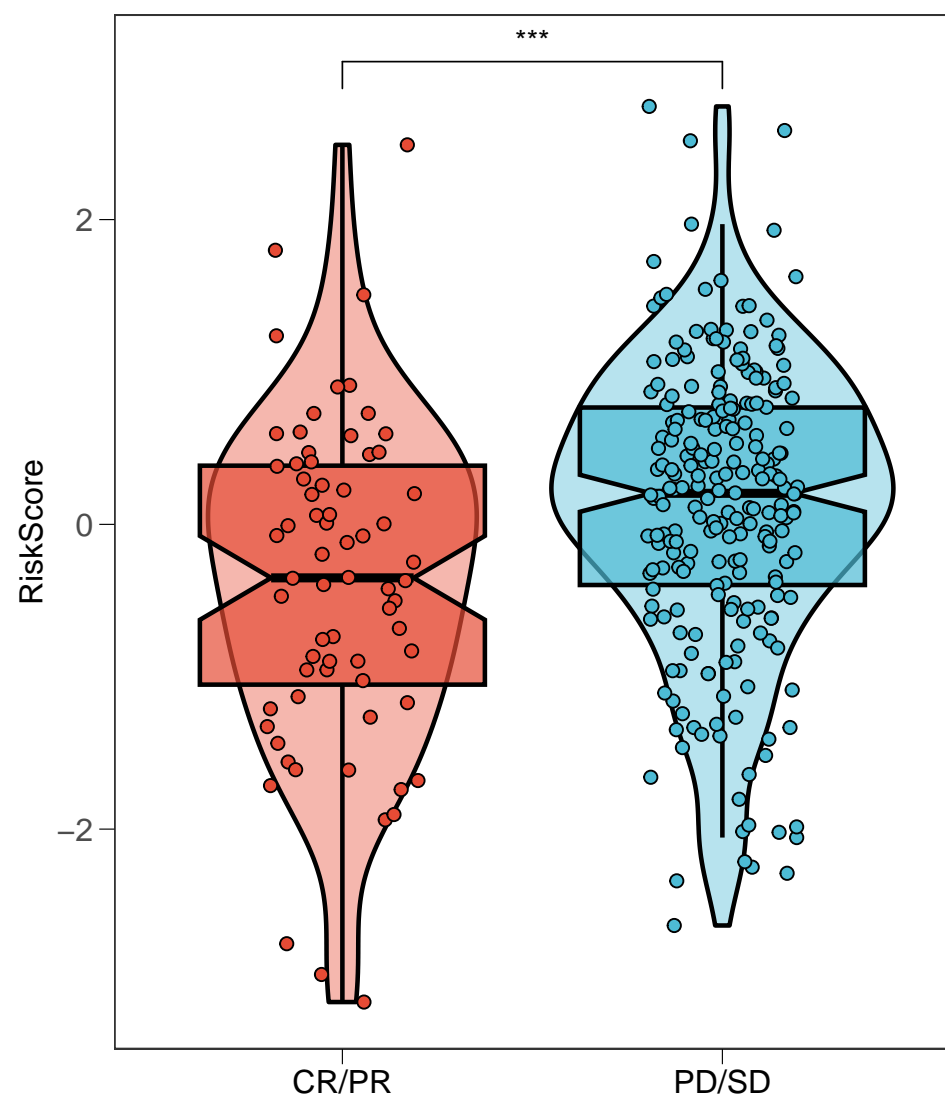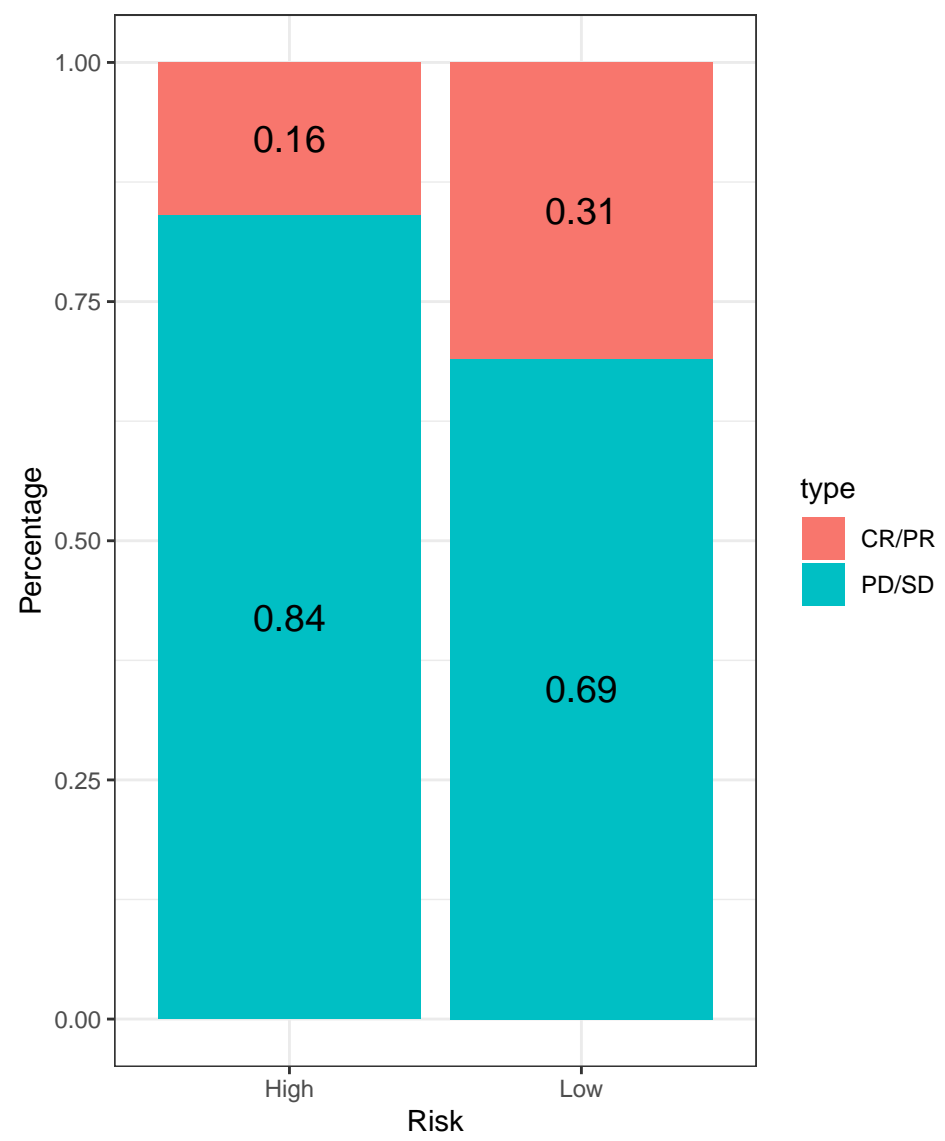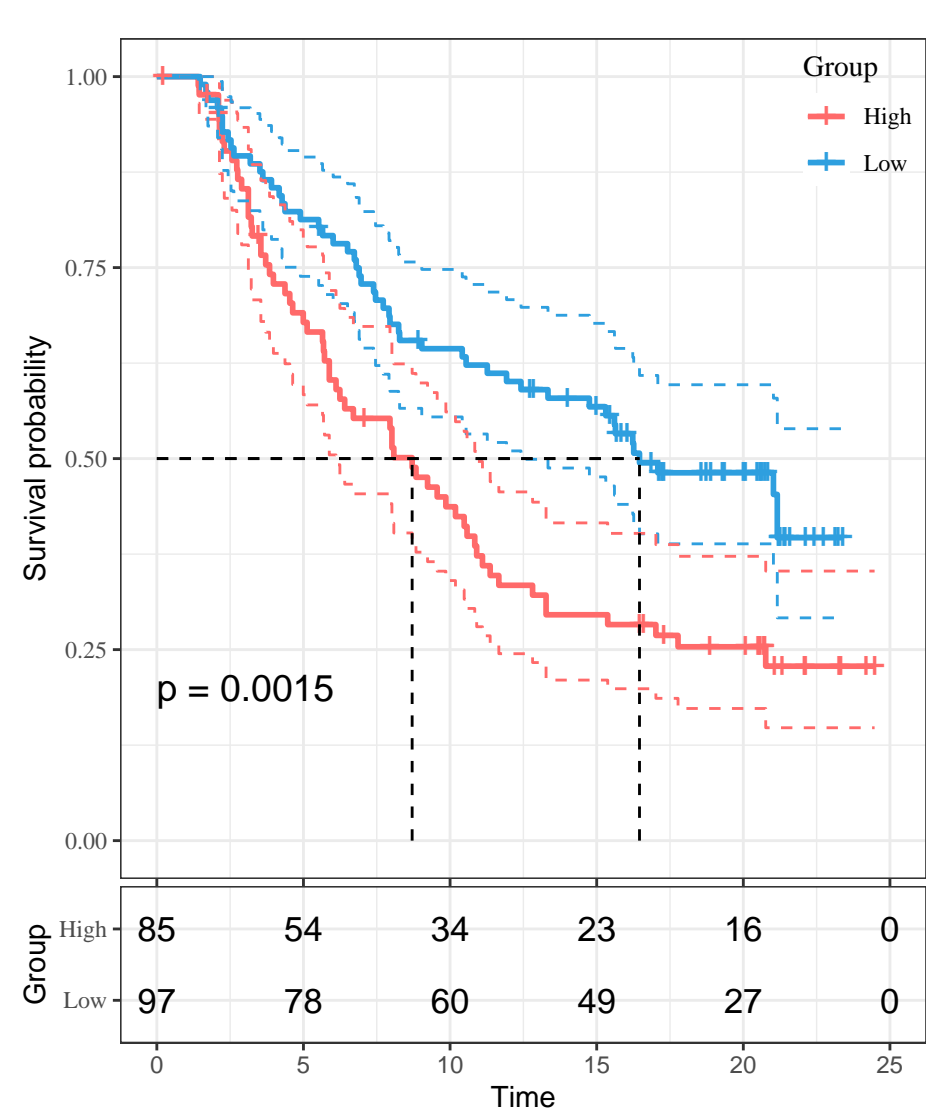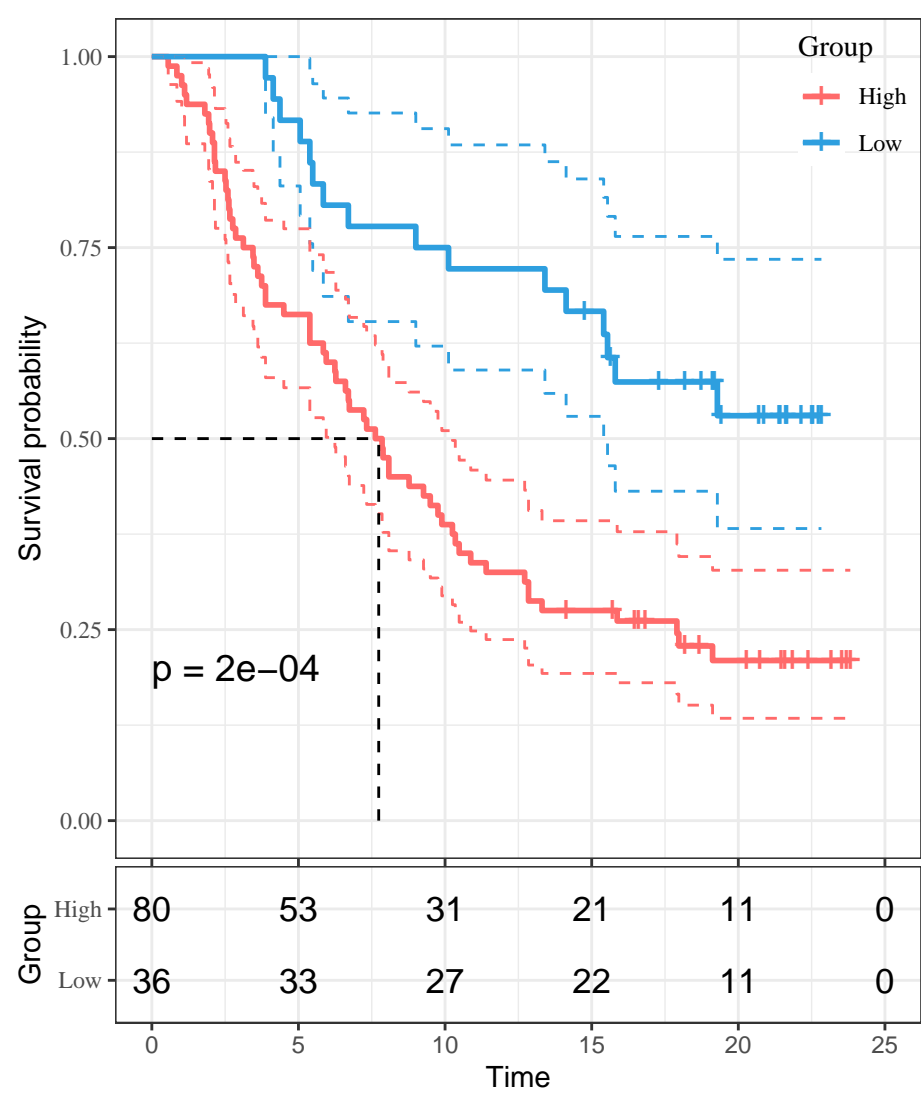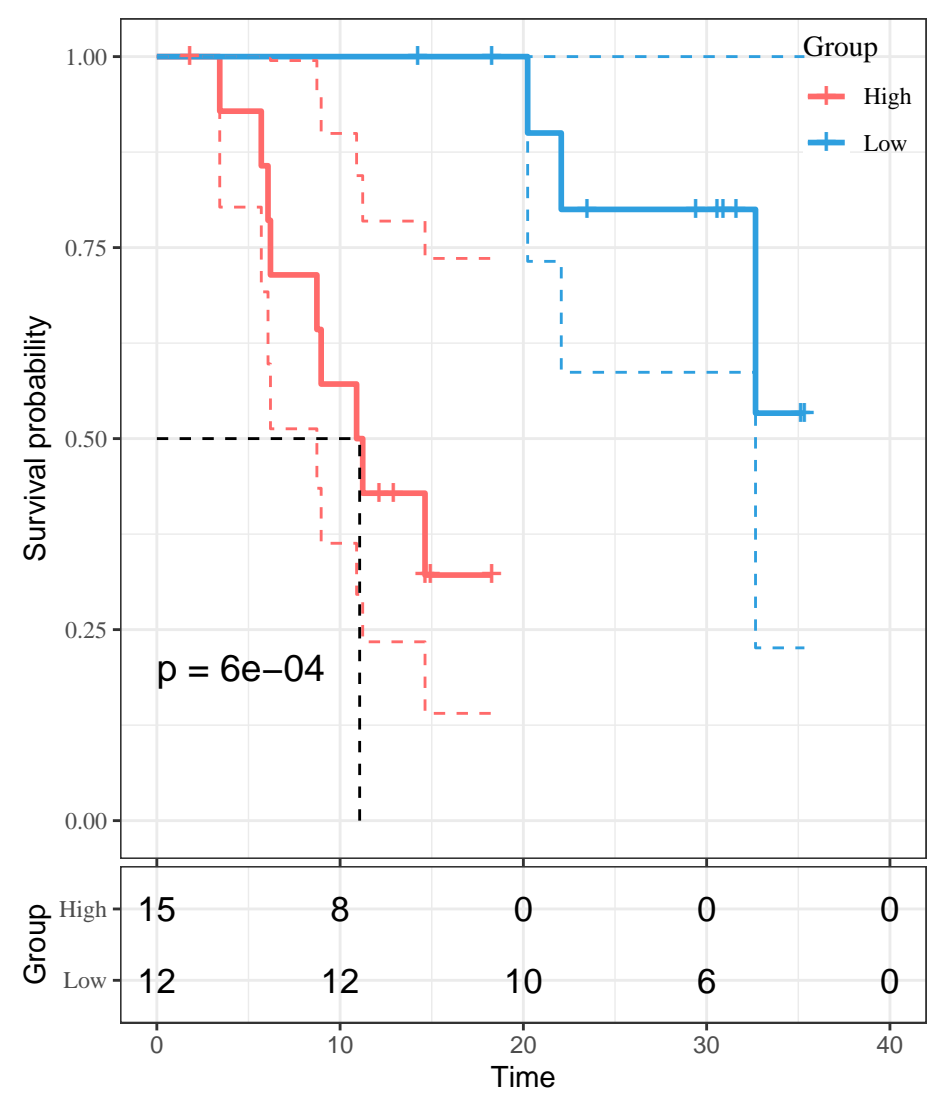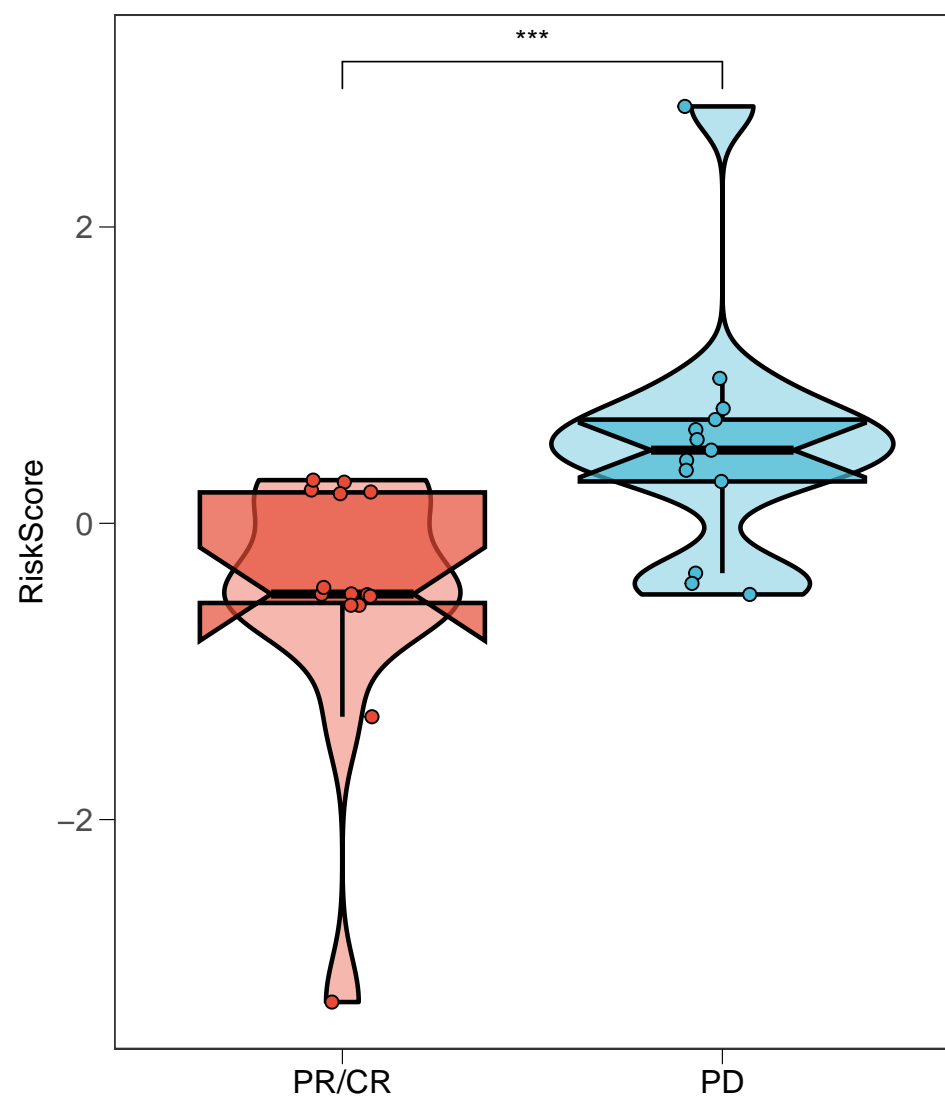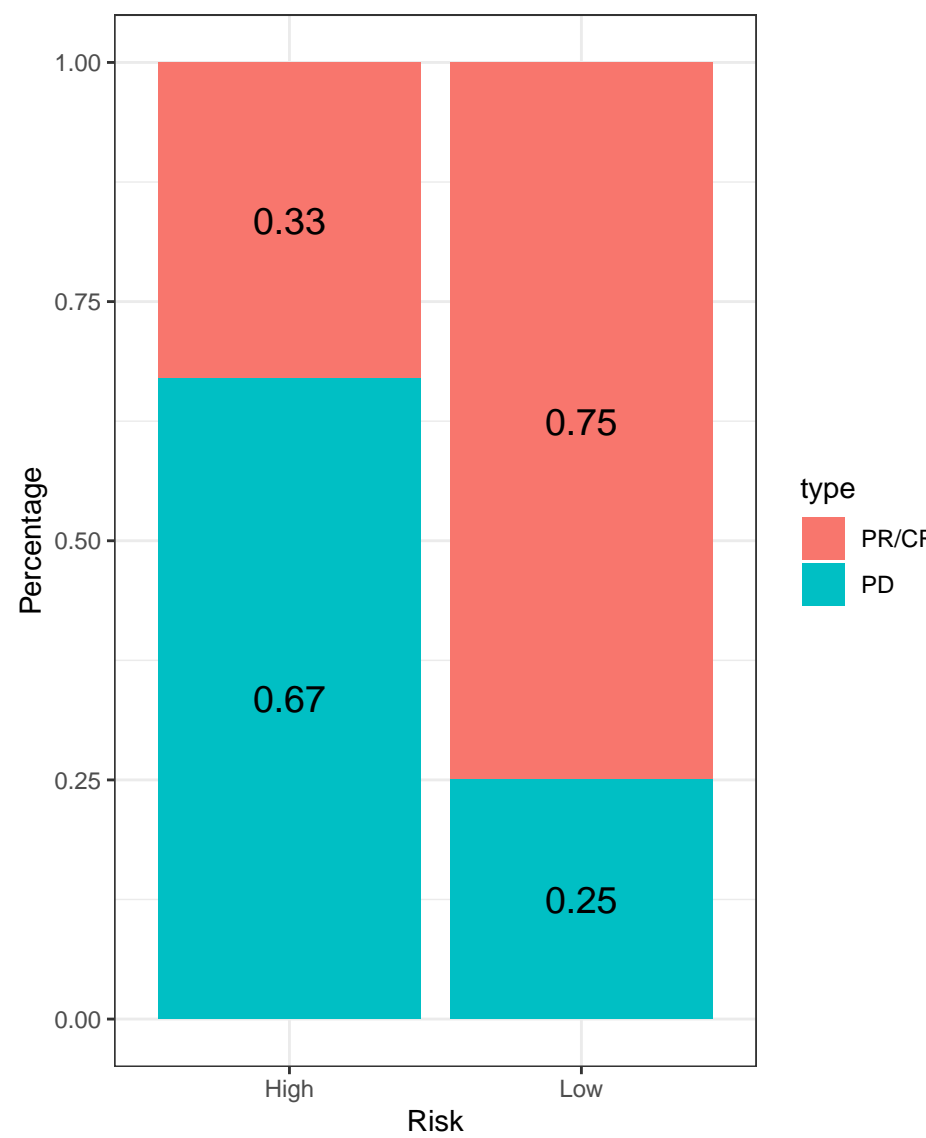

Supplement: Supplementary file 1 [file 20319ab3e1263a9013e4a863.pdf]

# ITGA5 expression

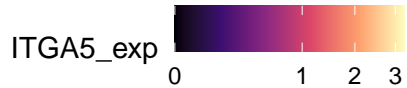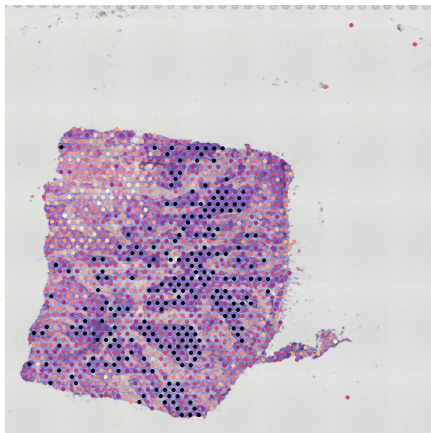

Supplement: Supplementary file 2 [file 2a43de2ca7c9f9aebbbf4be2.pdf]

# Macrophage differentiation trajectory

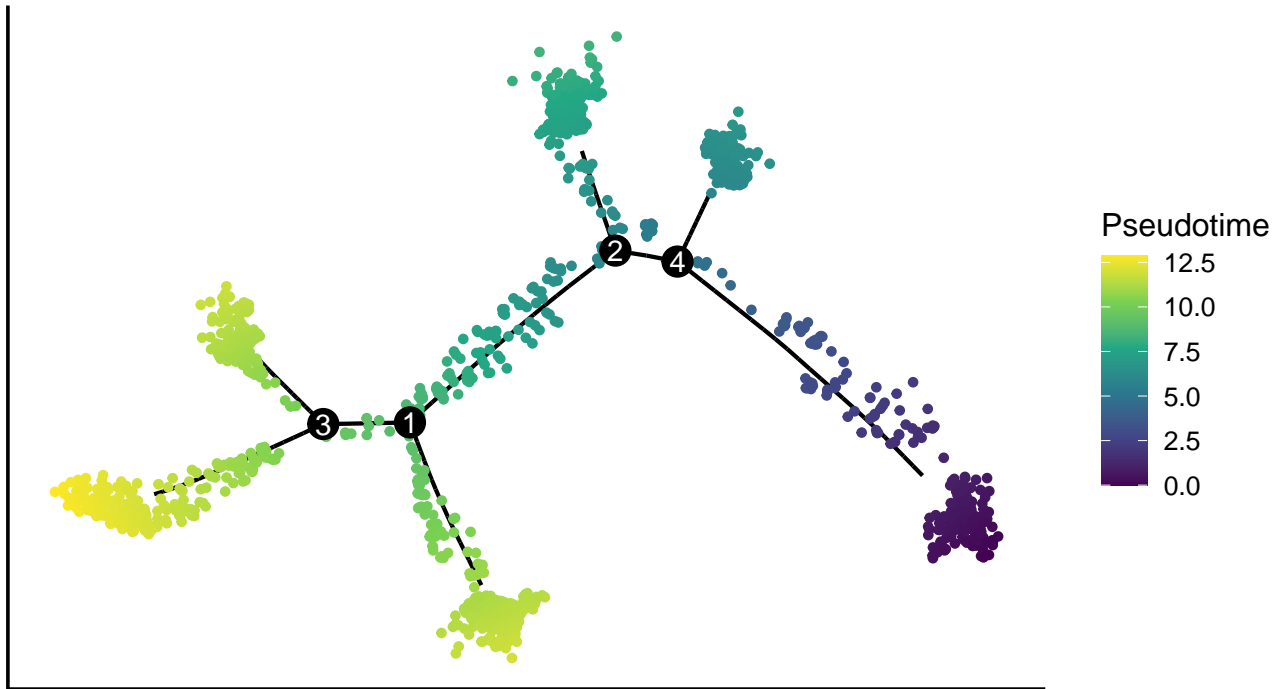

Supplement: Supplementary file 3 [file 2fe09b560cdc71e69e2e2498.pdf]

# Initial Myeloid Clusters

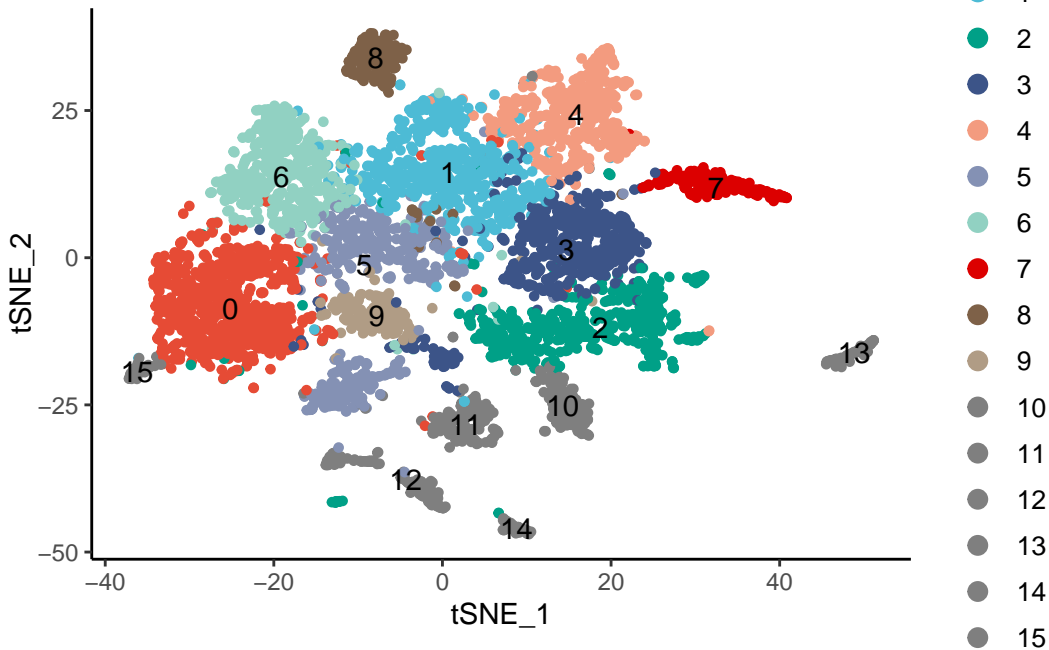

Supplement: Supplementary file 4 [file 4bbf25c87d505f417fceb2b1.pdf]

# Myeloid Subtypes

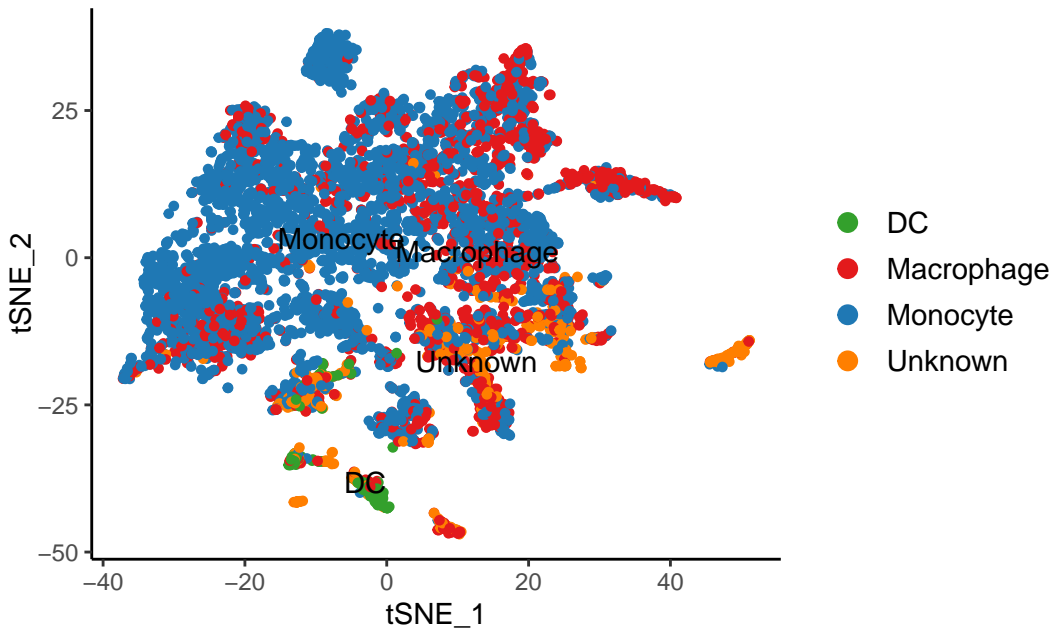

Supplement: Supplementary file 5 [file 4cf250a54d5ade8eaebb5f3e.pdf]

# Correlation between ITGA5 and LDL Metabolism Score

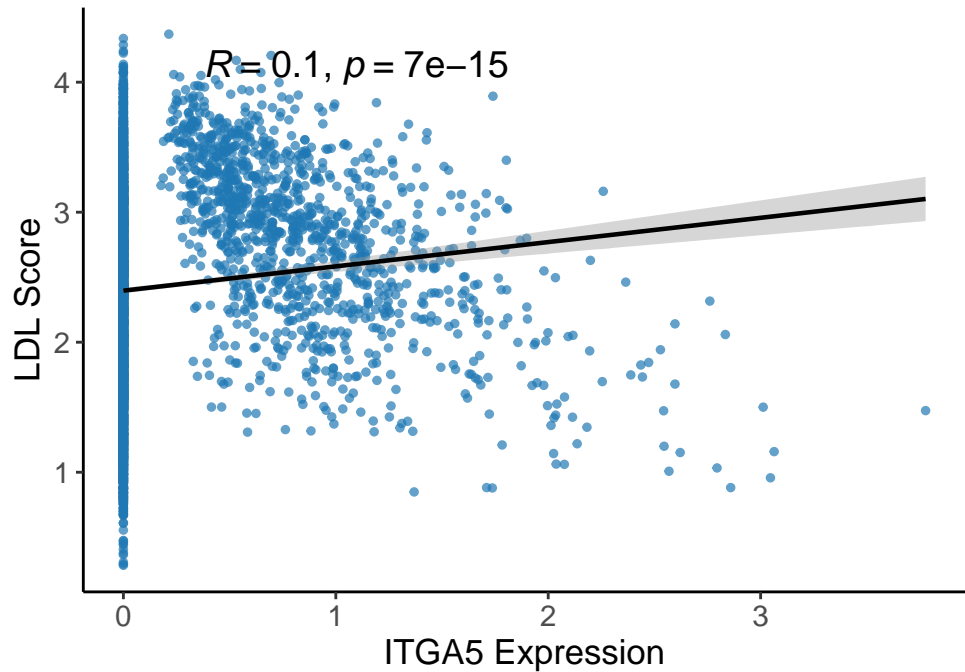

Supplement: Supplementary file 6 [file 62b6d64b431a0f373d412d64.pdf]

# LDL Metabolism Activity across Macrophage Subtypes

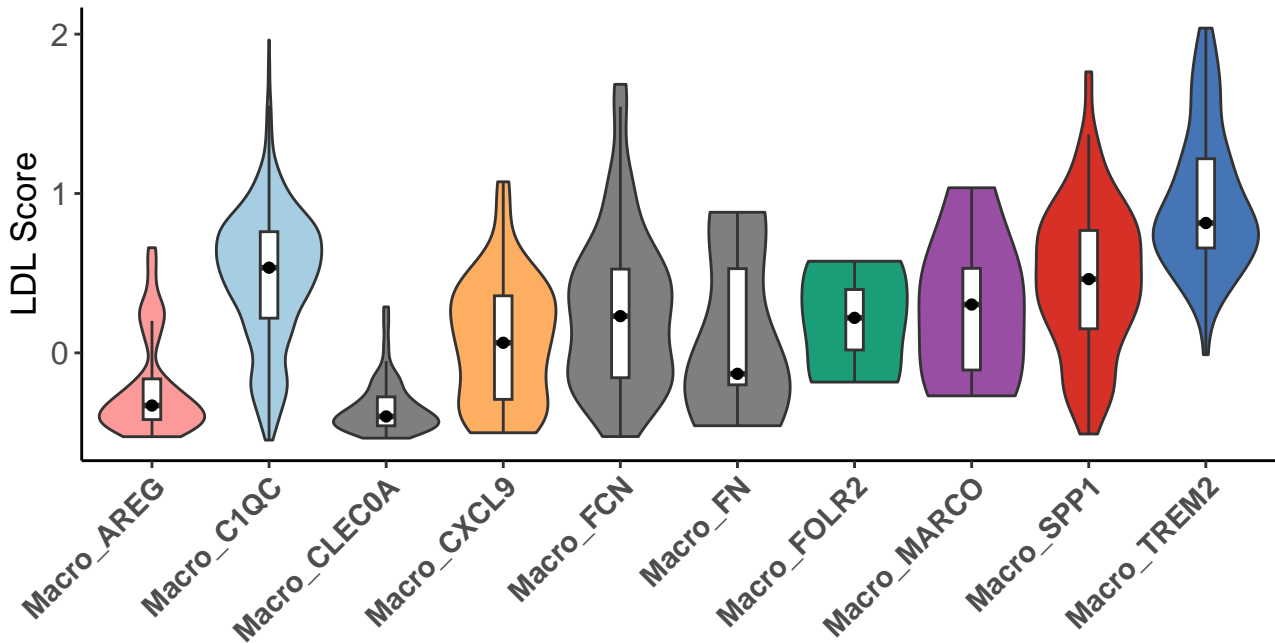

Supplement: Supplementary file 7 [file 64a3060fefcba17e0a02247f.pdf]

# Macrophage trajectory (Monocle2)

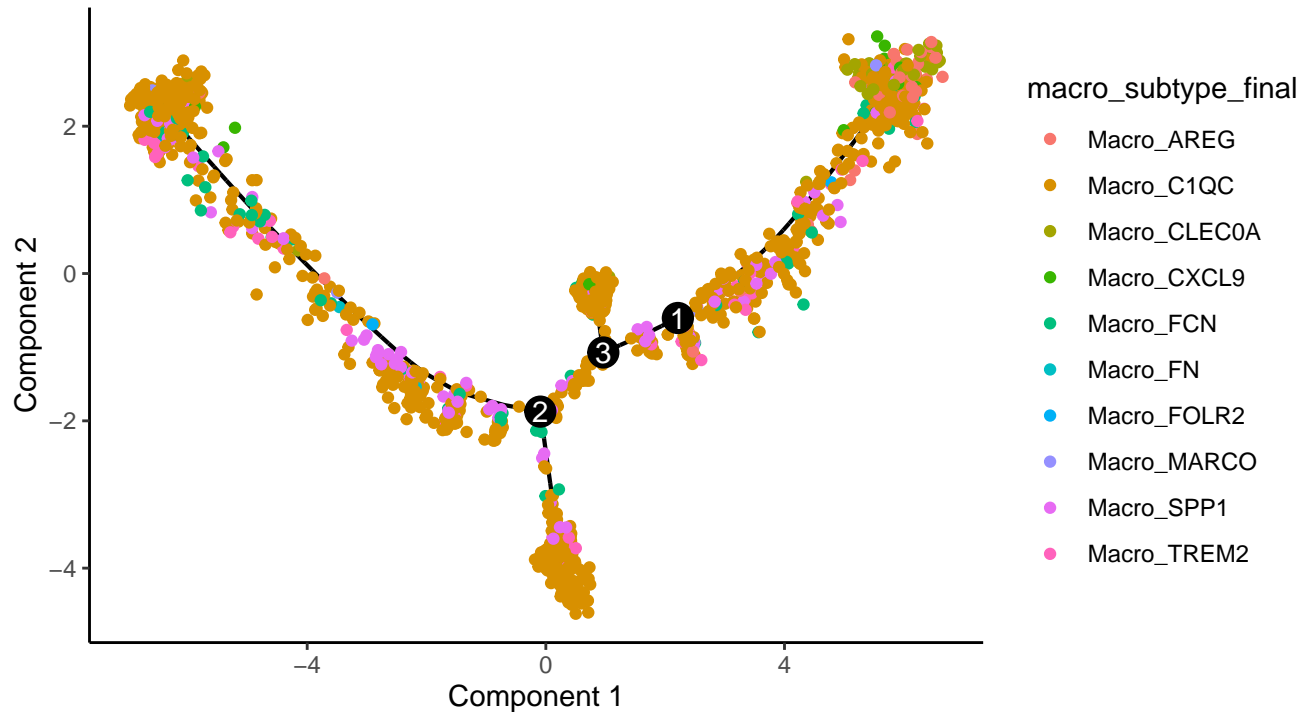

Supplement: Supplementary file 8 [file 658b7493832251b31e858bf5.pdf]

# KEGG Pathway Enrichment

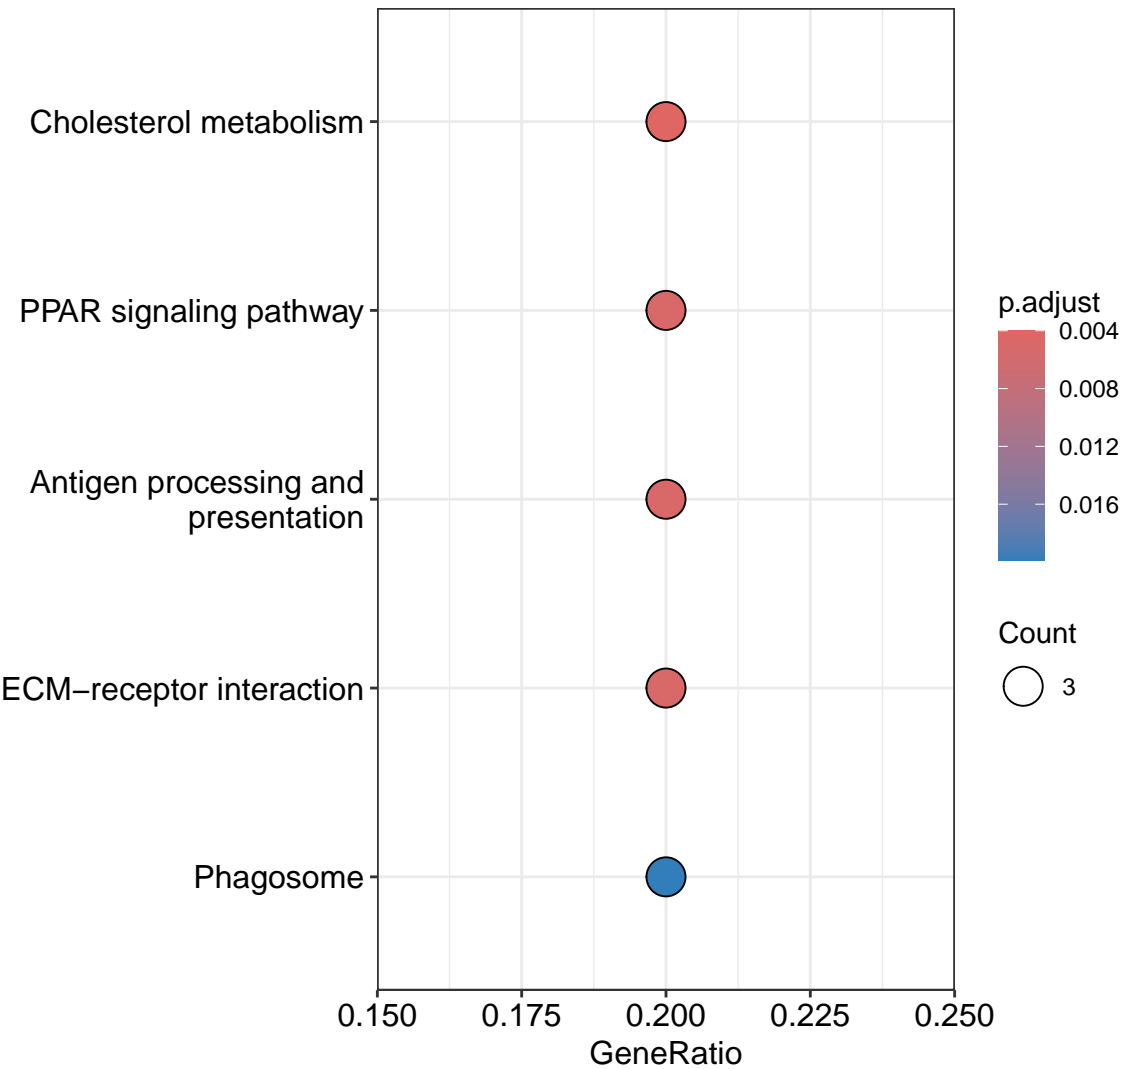

Supplement: Supplementary file 9 [file 67ab5a713c71d893c63c0fb7.pdf]

# LDL metabolic activity

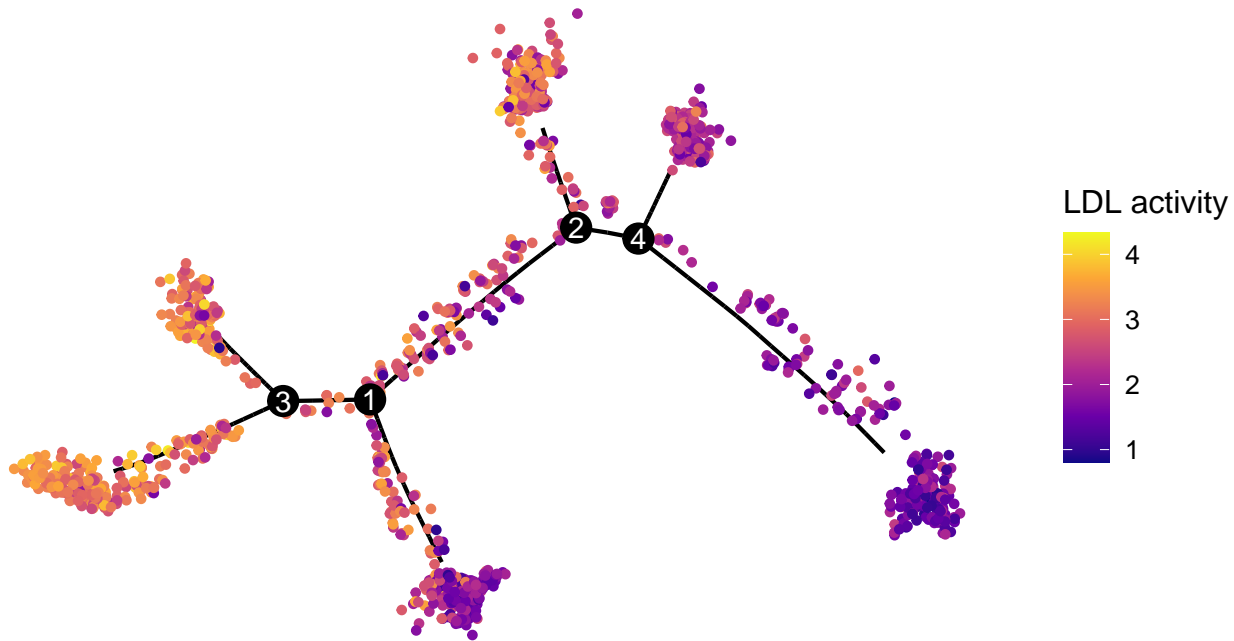

Supplement: Supplementary file 10 [file 6ce49c5de5666edc92e0932c.pdf]

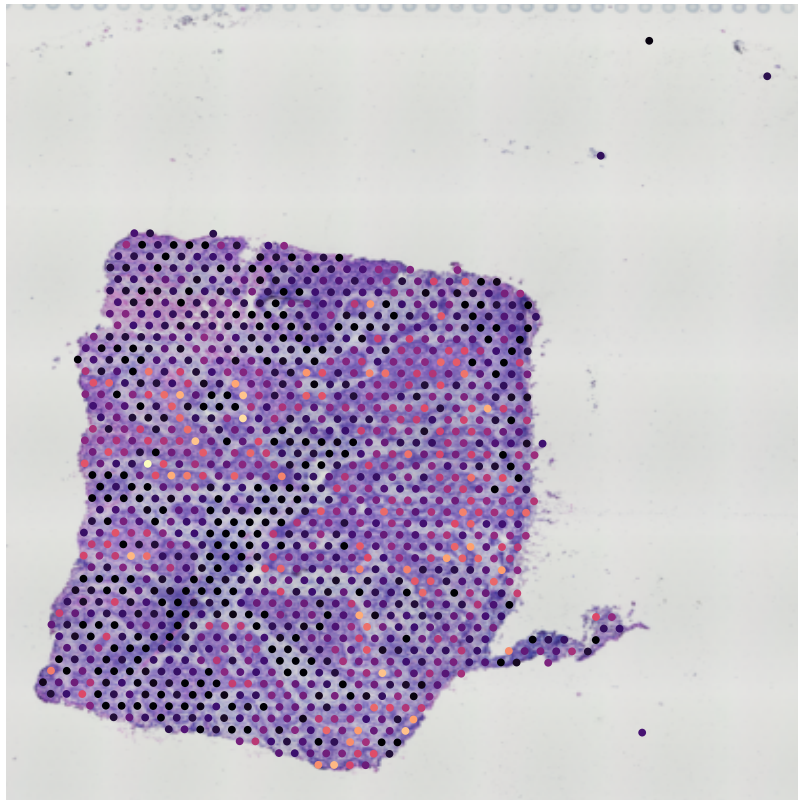

LDL score

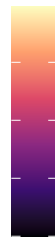

0.15

0.10

0.05

0.00

Supplement: Supplementary file 11 [file 706a8915e6761359b1ae102c.pdf]

# GO Enrichment

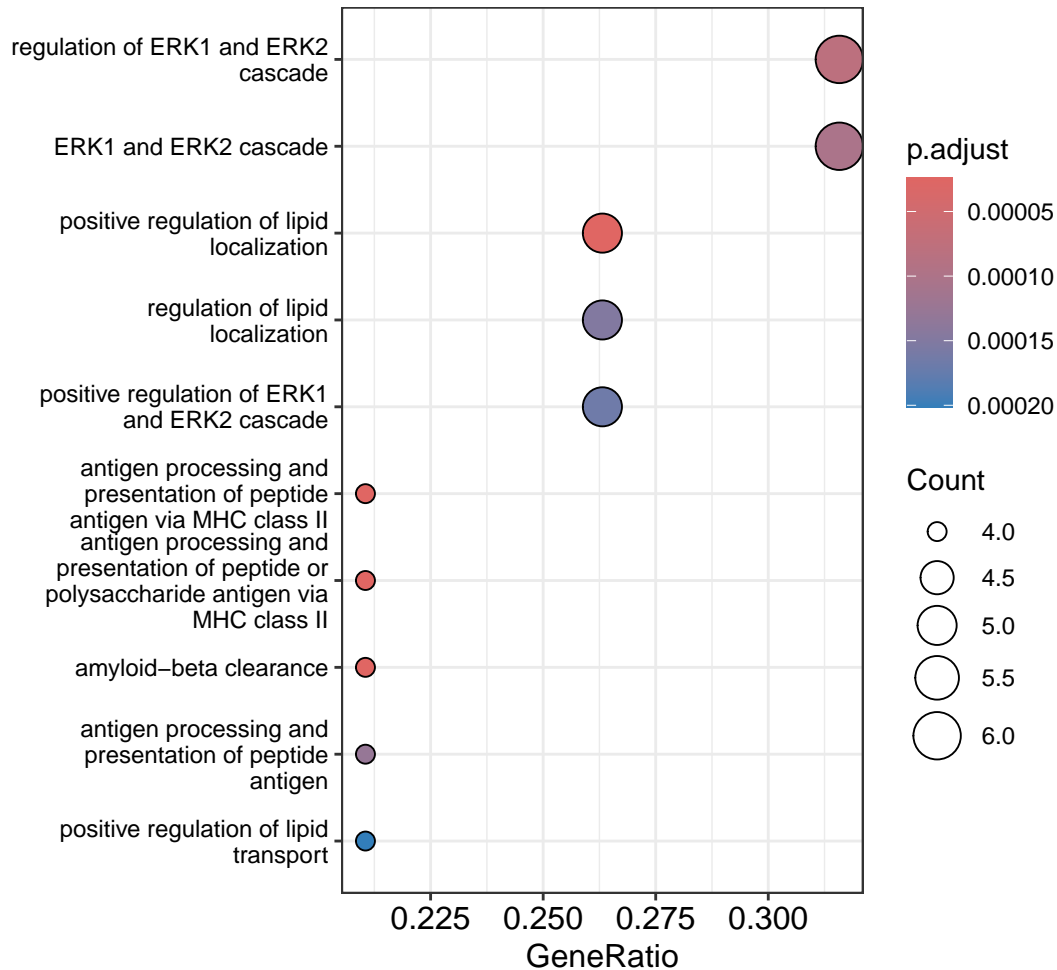

Supplement: Supplementary file 12 [file 7a90383a4ade9e20e82ed716.pdf]

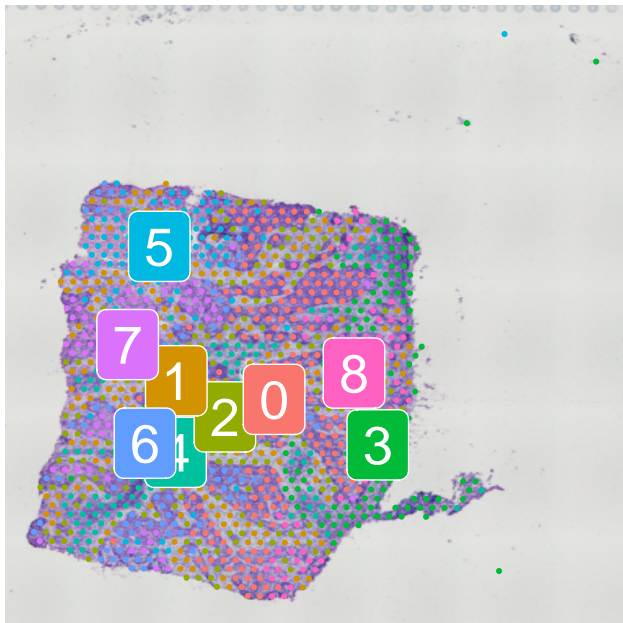

ident

- 0
- 1
- 2
- 3
- 4
- 5
- 6
- 7
- 8

Supplement: Supplementary file 13 [file 8f091aa1170465598eaa5d59.pdf]

# ITGA5 High/Low Clusters

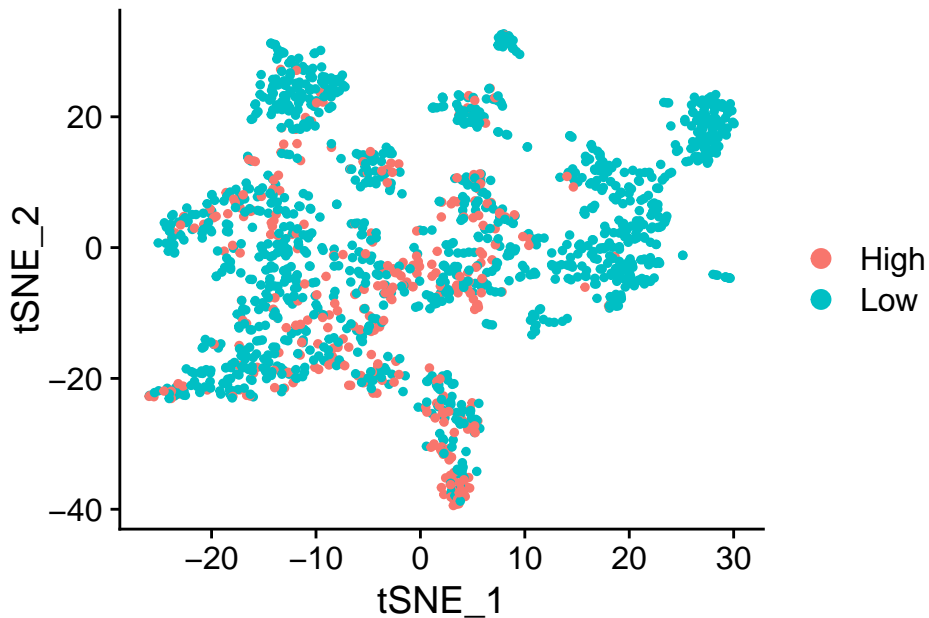

Supplement: Supplementary file 15 [file 94b5664f618a10033622d7ff.pdf]

# DATA SET

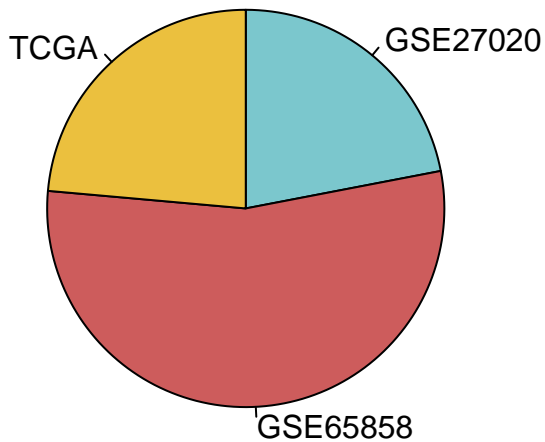

Supplement: Supplementary file 17 [file a2b6dee6da5e74f21069b84b.pdf]

# Refined Macrophage Subtypes

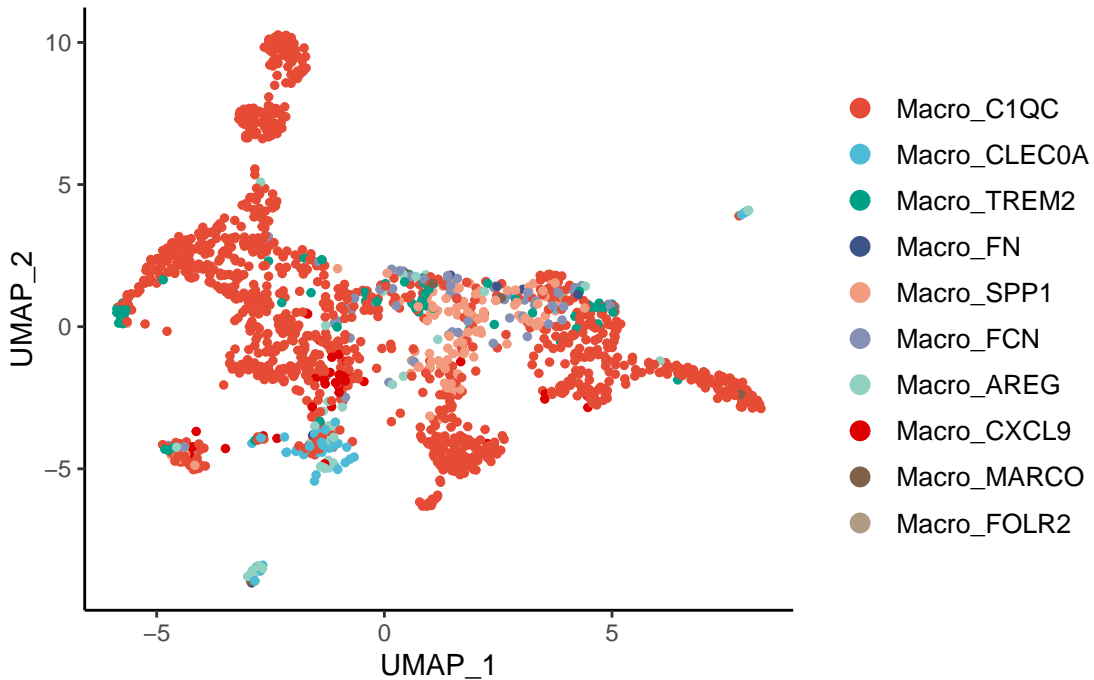

Supplement: Supplementary file 18 [file ac338e87c8aa0f9831477982.pdf]

# Macrophage lineage trajectory

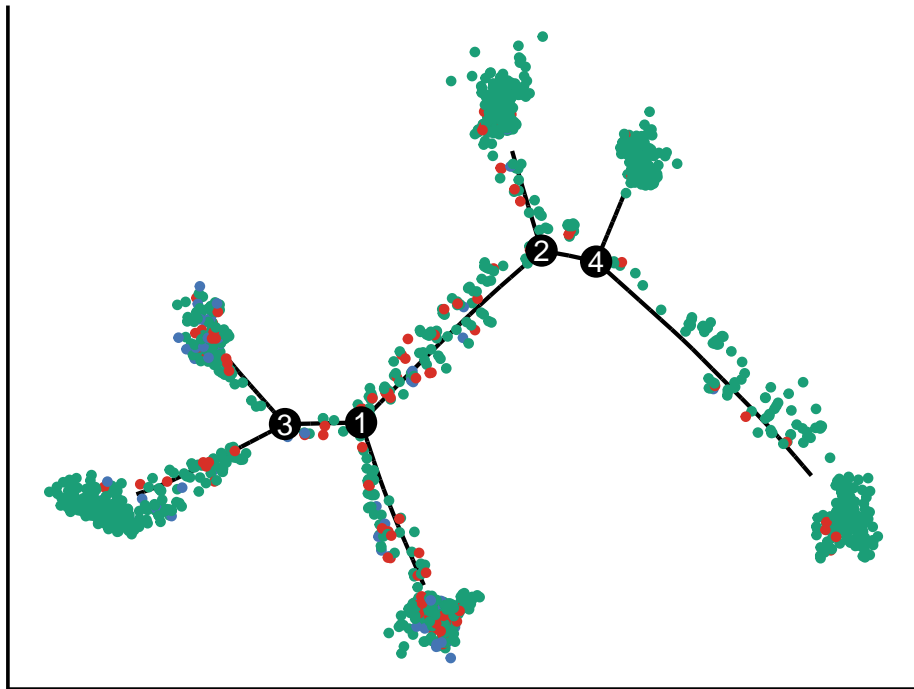

macro\_subtype\_final

- Macro\_C1QC
- Macro\_SPP1
- Macro\_TREM2

Supplement: Supplementary file 19 [file db56b870317dfed6a0391b13.pdf]

# Top 20 Differentially Regulated Genes

Ranked by fold change (n = 19)

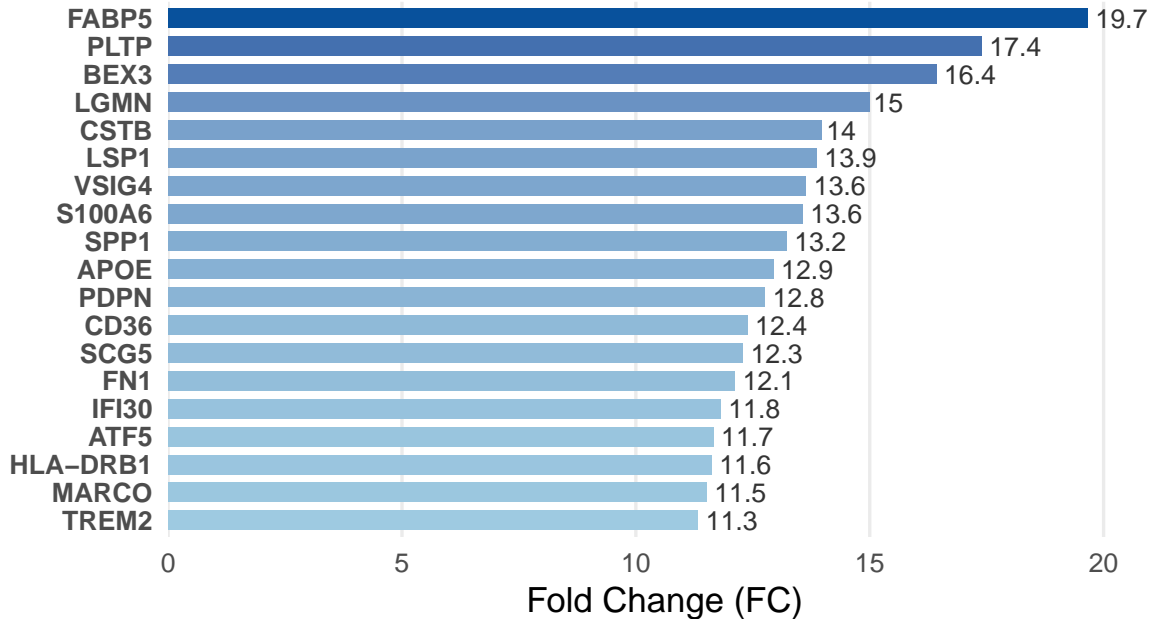

Supplement: Supplementary file 20 [file e06f1dfc4eecd33fda5d4f9c.pdf]

# ITGA5 expression

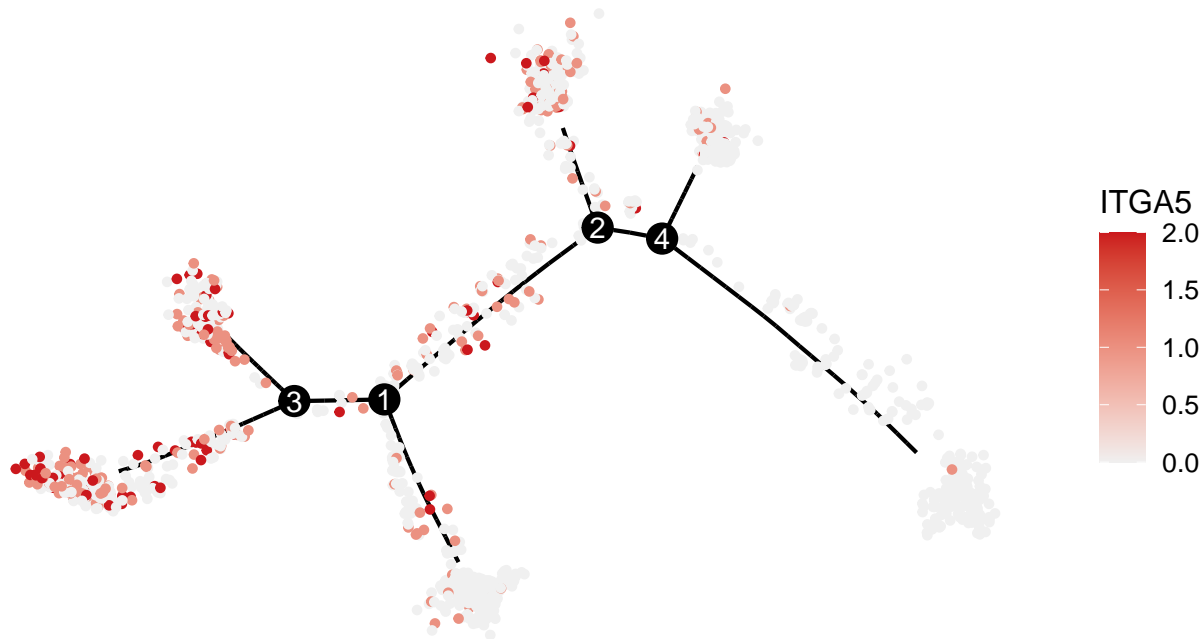

Supplement: Supplementary file 21 [file e8168d9fbf603d6786df044a.pdf]

# LDL Metabolism Score across Myeloid Subtypes

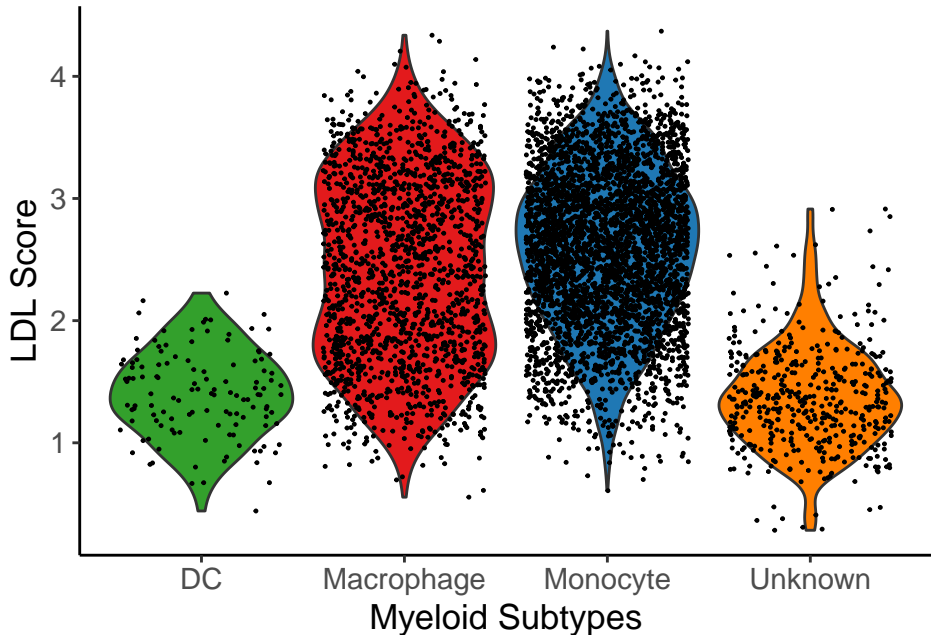

Supplement: Supplementary file 22 [file eeaab716a99d0ac9e873a6c2.pdf]
